# Supplementary material for: Genome-Wide and Phase-Specific DNA-Binding Rhythms of BMAL1 Control Circadian Output Functions in Mouse Liver
Source: PLoS Biol. 2011 Feb 22;9(2):e1000595. doi: 10.1371/journal.pbio.1000595 (PMC3043000; doi:10.1371/journal.pbio.1000595)
Supplement: Figure S7 — Pre-mRNA and mRNA measurements of longer lived transcripts. (A) mRNA transcript stability may explain lag and relative amplitude between pre-mRNA and mRNA accumulation in the Gys2, March8, and Qdpr transcripts. Experiments were performed as described in Figure 7A–7C. Approximate half-lives for March8 and Qdpr are 5.4 h and >10 h, while that for Gys2 is not available (see [B]). (B) mRNA half-lives from mouse embryonic stem cells [61] and mouse fibroblasts [62] for the genes in Figure 7A–7C and (A). When several measurements from the same cell line were available, we took the mean. (0.51 MB PDF) [file pbio.1000595.s007.pdf]

**A**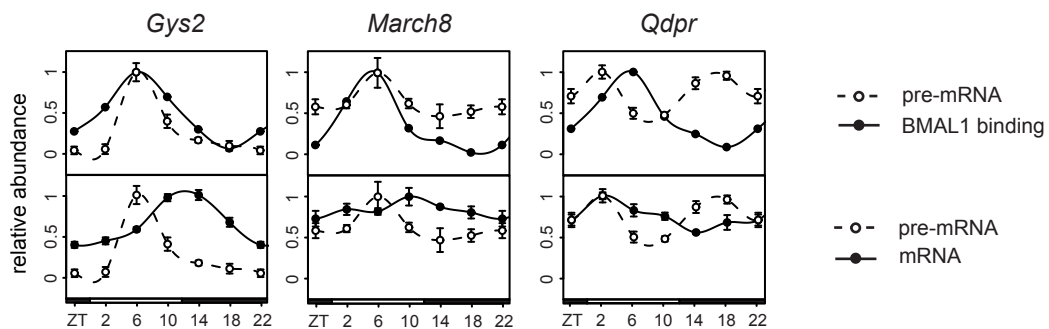**B**

| Gene Name        | mRNA half-life [hours] |                |
|------------------|------------------------|----------------|
|                  | Sharova et al.         | Friedel et al. |
| Dec2             | 3.3                    | -              |
| Cry1             | 3.6                    | 3.9            |
| Cry2             | 4.2                    | -              |
| Dbp              | 5.0                    | -              |
| March8           | 5.4                    | -              |
| Rev-Erb $\alpha$ | 3.1                    | -              |
| Rev-Erb $\beta$  | 4.3                    | 3.0            |
| Per1             | 3.7                    | -              |
| Per2             | 2.9                    | 0.9            |
| Qdpr             | 9.4                    | 34.8           |
| Ror $\gamma$     | 5.0                    | -              |
| Tef              | 7.1                    | 3.7            |
