# Supplementary material for: Genome-Wide and Phase-Specific DNA-Binding Rhythms of BMAL1 Control Circadian Output Functions in Mouse Liver
Source: PubMed Central journal article supplement (PMC3043000; doi:10.1371/journal.pbio.1000595), 2011-02-22

**A**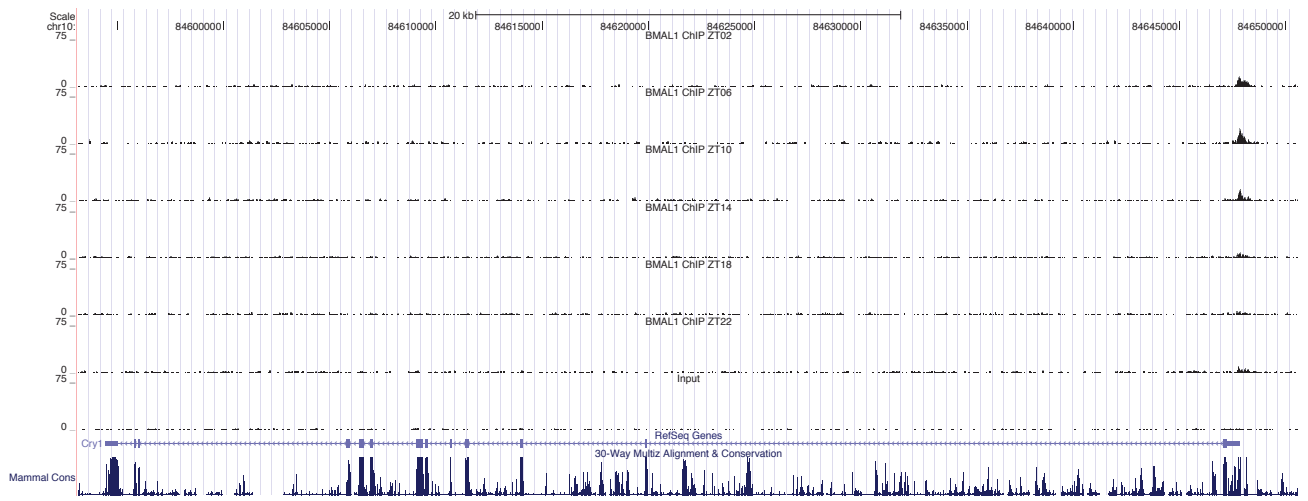**B**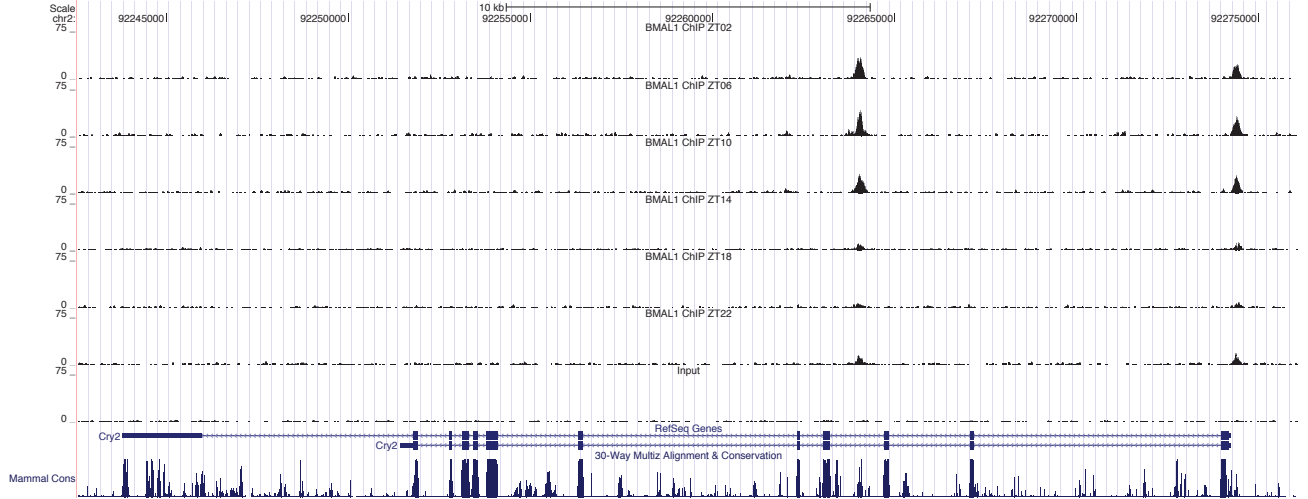**C**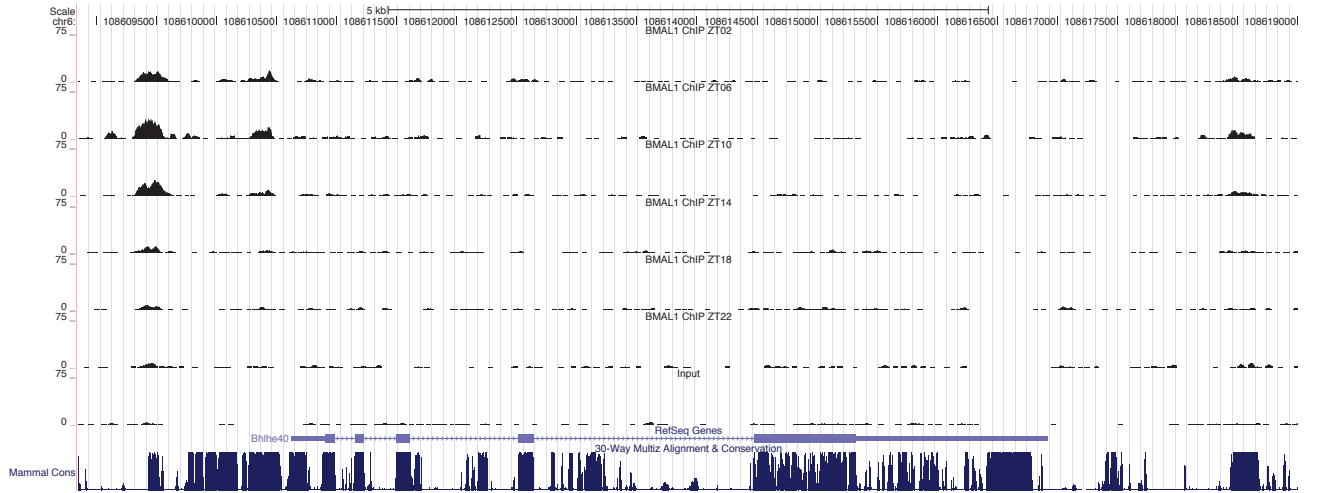**D**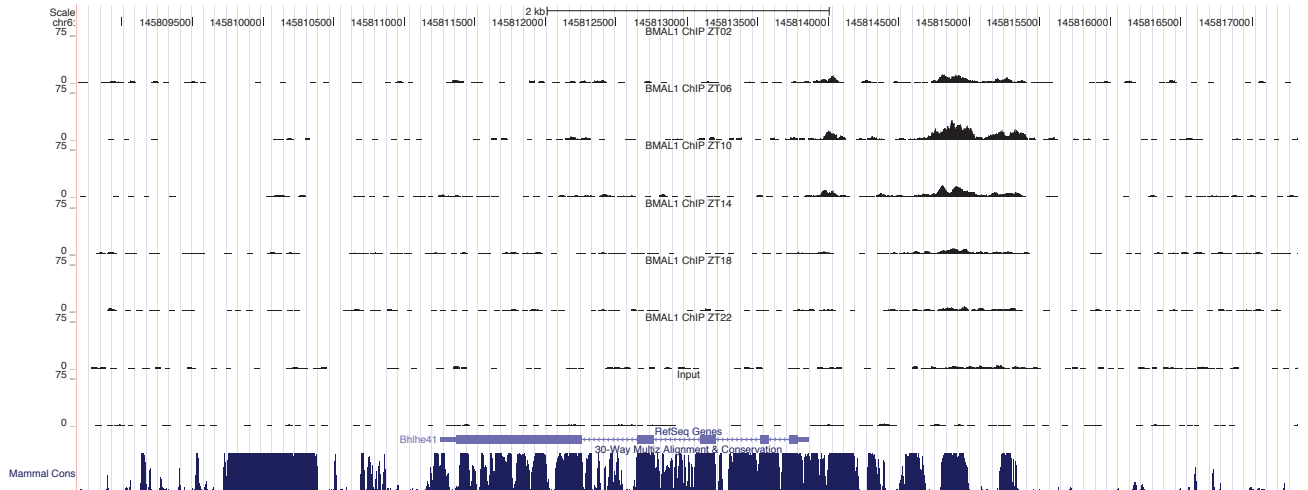

**E**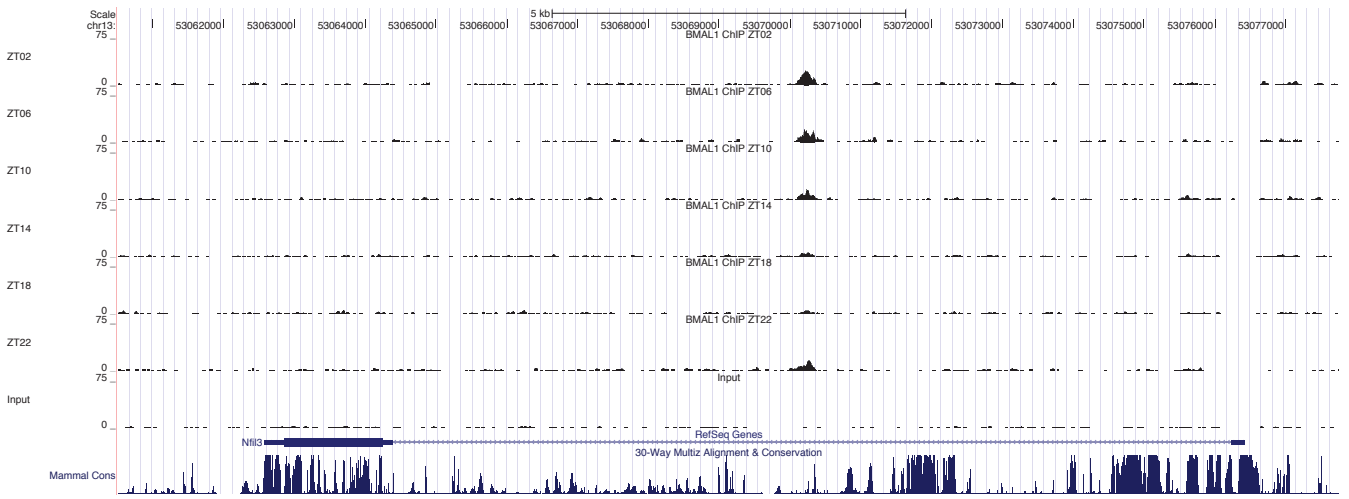**F**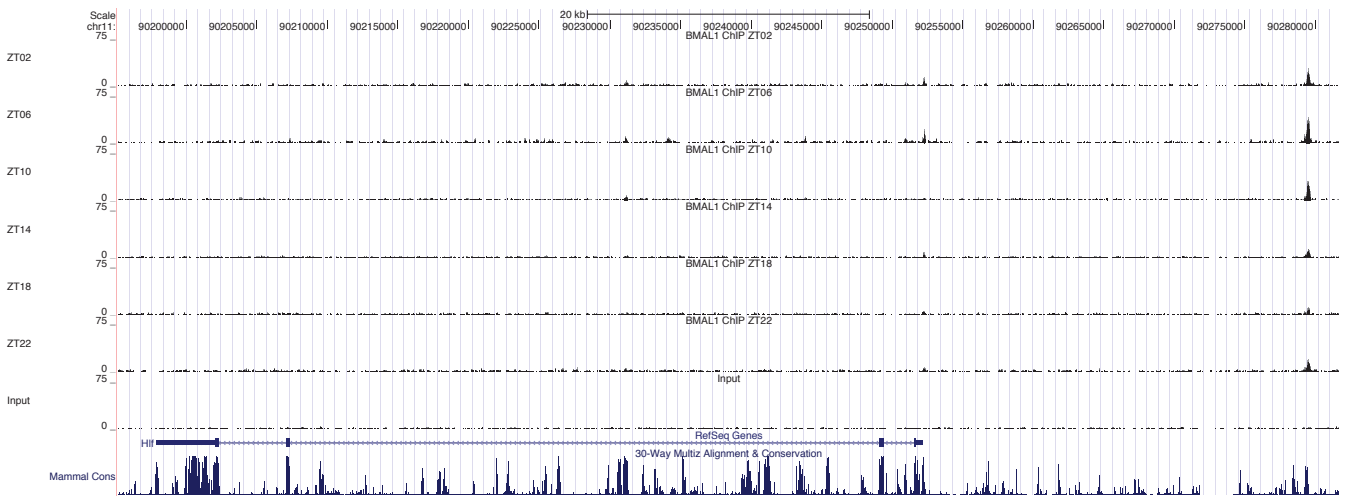**G**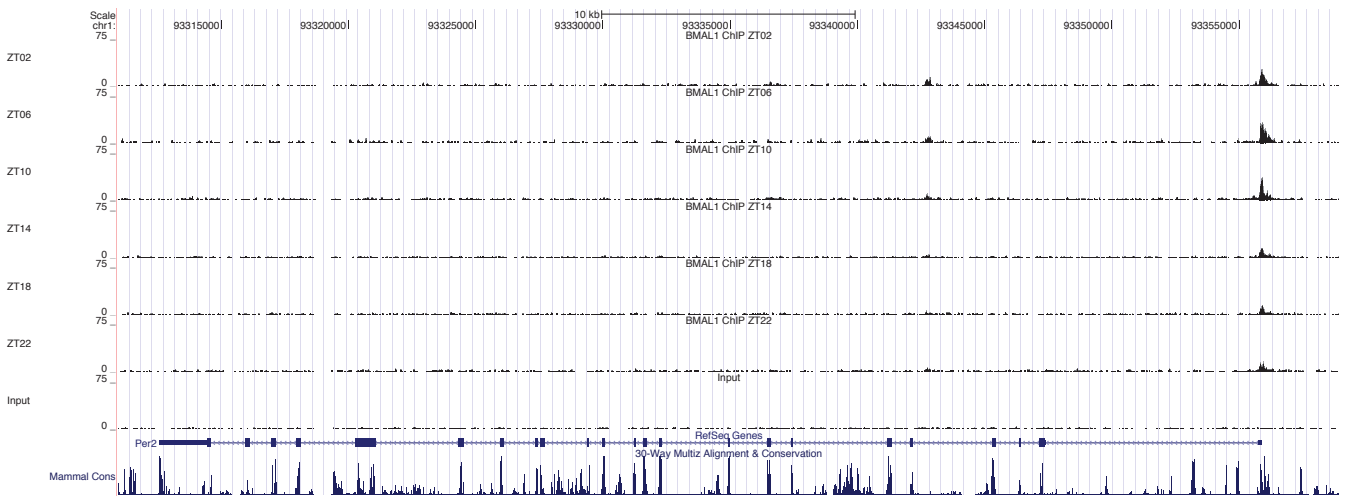**H**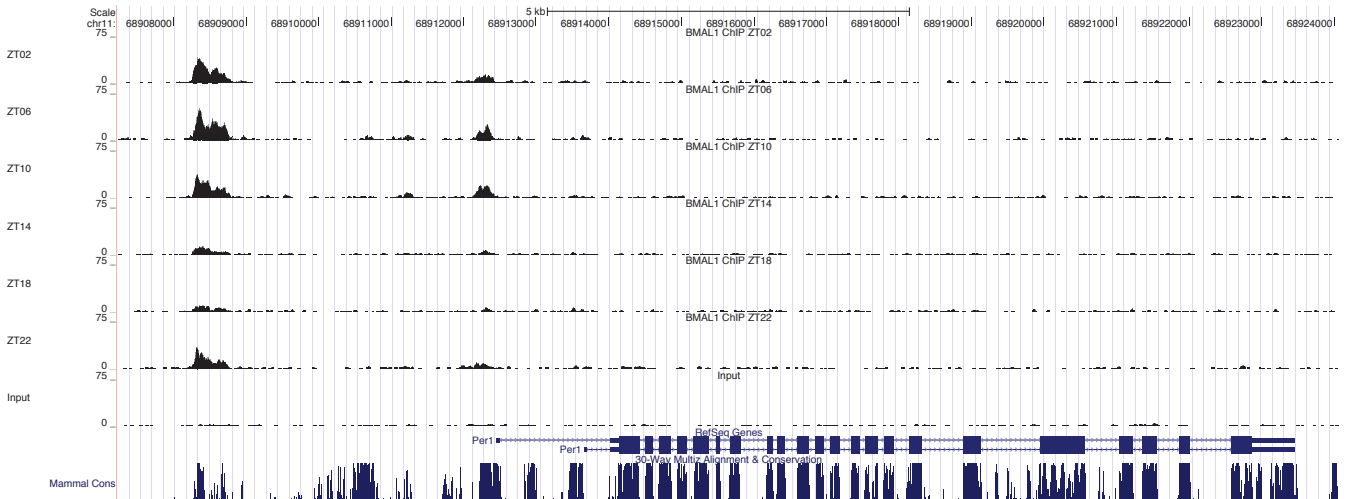

**I**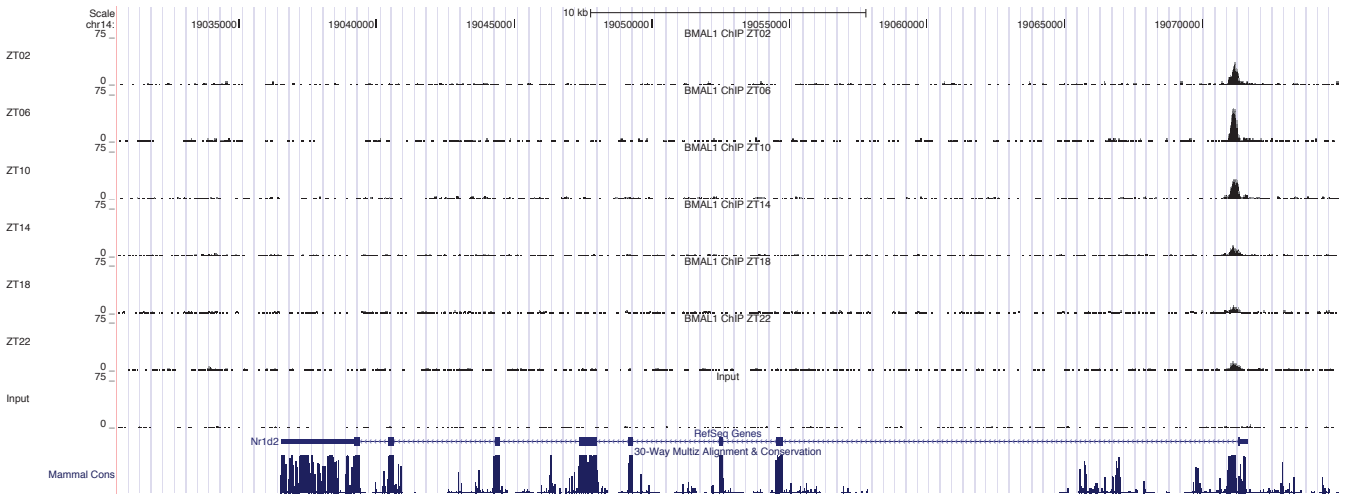**J**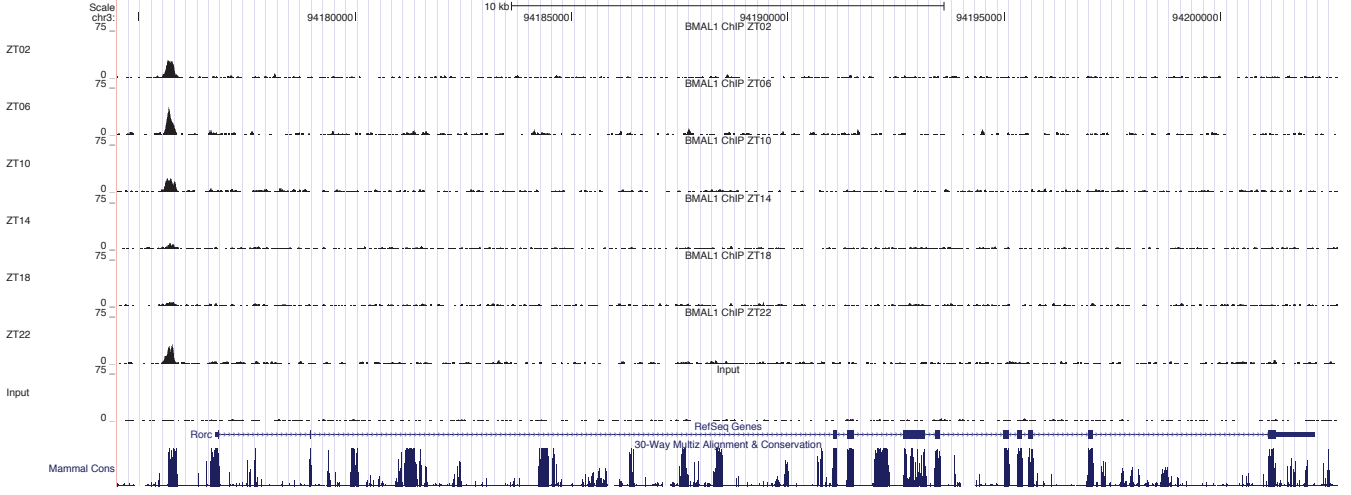**K**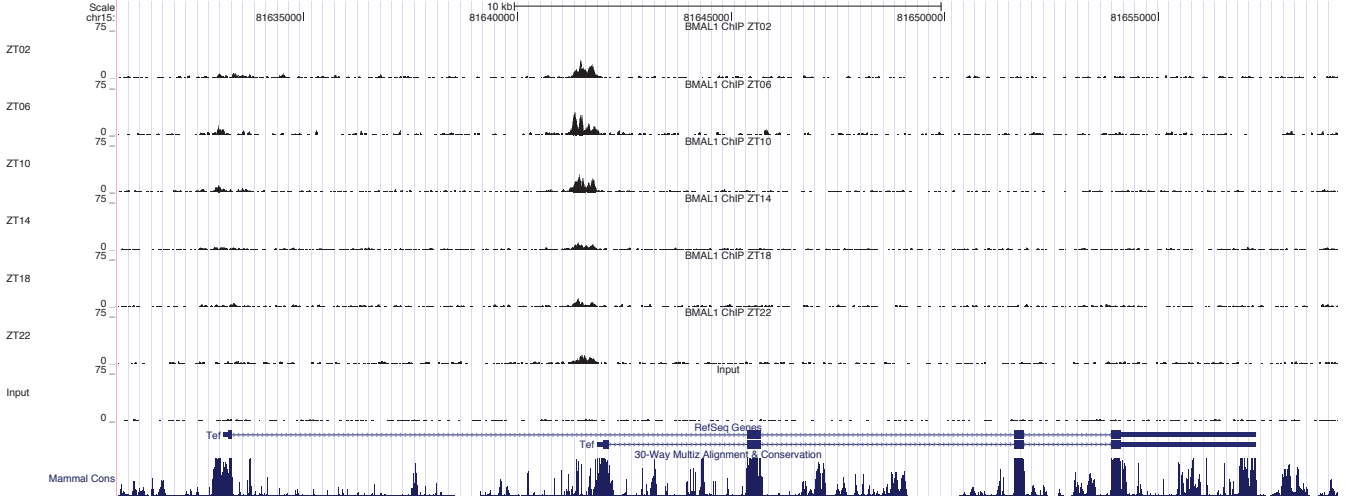

Supplement: pbio.1000595.s002.pdf [file pbio.1000595.s002.pdf]
