# Supplementary material for: Genome-Wide and Phase-Specific DNA-Binding Rhythms of BMAL1 Control Circadian Output Functions in Mouse Liver
Source: PubMed Central journal article supplement (PMC3043000; doi:10.1371/journal.pbio.1000595), 2011-02-22
Supplement: pbio.1000595.s012.pdf [file pbio.1000595.s012.pdf]

**Table S4. Enriched KEGG pathways identified with DAVID (p<0.05).**

| Category     | Term                                                        | RT                 | Genes | Count | %   | P-Value | Benjamini |
|--------------|-------------------------------------------------------------|--------------------|-------|-------|-----|---------|-----------|
| KEGG_PATHWAY | <a href="#">Circadian rhythm</a>                            | <a href="#">RT</a> |       | 9     | 0.6 | 4.0E-7  | 6.8E-5    |
| KEGG_PATHWAY | <a href="#">Pathways in cancer</a>                          | <a href="#">RT</a> |       | 39    | 2.7 | 5.0E-4  | 4.2E-2    |
| KEGG_PATHWAY | <a href="#">Insulin signaling pathway</a>                   | <a href="#">RT</a> |       | 18    | 1.2 | 1.1E-2  | 4.8E-1    |
| KEGG_PATHWAY | <a href="#">Small cell lung cancer</a>                      | <a href="#">RT</a> |       | 13    | 0.9 | 1.1E-2  | 3.9E-1    |
| KEGG_PATHWAY | <a href="#">TGF-beta signaling pathway</a>                  | <a href="#">RT</a> |       | 13    | 0.9 | 1.4E-2  | 3.8E-1    |
| KEGG_PATHWAY | <a href="#">Alanine, aspartate and glutamate metabolism</a> | <a href="#">RT</a> |       | 7     | 0.5 | 1.4E-2  | 3.3E-1    |
| KEGG_PATHWAY | <a href="#">Renal cell carcinoma</a>                        | <a href="#">RT</a> |       | 11    | 0.8 | 1.9E-2  | 3.7E-1    |
| KEGG_PATHWAY | <a href="#">Glycine, serine and threonine metabolism</a>    | <a href="#">RT</a> |       | 7     | 0.5 | 1.9E-2  | 3.3E-1    |
| KEGG_PATHWAY | <a href="#">Cysteine and methionine metabolism</a>          | <a href="#">RT</a> |       | 7     | 0.5 | 2.2E-2  | 3.4E-1    |
| KEGG_PATHWAY | <a href="#">Nicotinate and nicotinamide metabolism</a>      | <a href="#">RT</a> |       | 6     | 0.4 | 2.4E-2  | 3.4E-1    |
| KEGG_PATHWAY | <a href="#">Adipocytokine signaling pathway</a>             | <a href="#">RT</a> |       | 10    | 0.7 | 3.6E-2  | 4.3E-1    |
| KEGG_PATHWAY | <a href="#">PPAR signaling pathway</a>                      | <a href="#">RT</a> |       | 11    | 0.8 | 4.0E-2  | 4.4E-1    |
| KEGG_PATHWAY | <a href="#">Prostate cancer</a>                             | <a href="#">RT</a> |       | 12    | 0.8 | 4.0E-2  | 4.2E-1    |
| KEGG_PATHWAY | <a href="#">Oocyte meiosis</a>                              | <a href="#">RT</a> |       | 14    | 1.0 | 4.6E-2  | 4.4E-1    |

The BMAL1 putative targets in the three most significant pathways are shown in the Figure S5.
