# Supplementary material for: Genome-Wide and Phase-Specific DNA-Binding Rhythms of BMAL1 Control Circadian Output Functions in Mouse Liver
Source: PubMed Central journal article supplement (PMC3043000; doi:10.1371/journal.pbio.1000595), 2011-02-22
Supplement: pbio.1000595.s013.pdf [file pbio.1000595.s013.pdf]

**Table S5. Position weight matrix for the E1-E2 motif.**

|           | <b>A</b> | <b>C</b> | <b>G</b> | <b>T</b> |
|-----------|----------|----------|----------|----------|
| <b>1</b>  | 0.21     | 0.34     | 0.31     | 0.15     |
| <b>2</b>  | 0.29     | 0.20     | 0.33     | 0.18     |
| <b>3</b>  | 0.19     | 0.30     | 0.40     | 0.11     |
| <b>4</b>  | 0.22     | 0.06     | 0.34     | 0.39     |
| <b>5</b>  | 0.01     | 0.99     | 0.00     | 0.00     |
| <b>6</b>  | 0.98     | 0.00     | 0.00     | 0.02     |
| <b>7</b>  | 0.01     | 0.88     | 0.09     | 0.03     |
| <b>8</b>  | 0.29     | 0.07     | 0.61     | 0.03     |
| <b>9</b>  | 0.06     | 0.10     | 0.08     | 0.75     |
| <b>10</b> | 0.04     | 0.00     | 0.85     | 0.11     |
| <b>11</b> | 0.07     | 0.29     | 0.43     | 0.21     |
| <b>12</b> | 0.27     | 0.41     | 0.17     | 0.15     |
| <b>13</b> | 0.22     | 0.37     | 0.21     | 0.20     |
| <b>14</b> | 0.23     | 0.30     | 0.32     | 0.15     |
| <b>15</b> | 0.19     | 0.18     | 0.54     | 0.09     |
| <b>16</b> | 0.16     | 0.18     | 0.53     | 0.14     |
| <b>17</b> | 0.21     | 0.32     | 0.43     | 0.03     |
| <b>18</b> | 0.18     | 0.71     | 0.09     | 0.01     |
| <b>19</b> | 0.62     | 0.05     | 0.17     | 0.16     |
| <b>20</b> | 0.03     | 0.47     | 0.31     | 0.20     |
| <b>21</b> | 0.15     | 0.16     | 0.65     | 0.05     |
| <b>22</b> | 0.12     | 0.08     | 0.21     | 0.60     |
| <b>23</b> | 0.01     | 0.03     | 0.92     | 0.04     |
| <b>24</b> | 0.23     | 0.49     | 0.19     | 0.09     |
| <b>25</b> | 0.29     | 0.27     | 0.22     | 0.23     |
| <b>26</b> | 0.19     | 0.26     | 0.41     | 0.13     |
| <b>27</b> | 0.17     | 0.32     | 0.38     | 0.12     |

E1 goes from position 1 to 13, position 14 corresponds to the spacer and E2 goes from position 15 to 27.
