# Supplementary material for: Genome-Wide and Phase-Specific DNA-Binding Rhythms of BMAL1 Control Circadian Output Functions in Mouse Liver
Source: PubMed Central journal article supplement (PMC3043000; doi:10.1371/journal.pbio.1000595), 2011-02-22
Supplement: pbio.1000595.s015.pdf [file pbio.1000595.s015.pdf]

**Table S7. Taqman probes for mRNA measurements.**

| Probe             | Sequence 5' -> 3'                        |
|-------------------|------------------------------------------|
| Dbp mRNA fwd      | AAGAAGGCAAGGAAAGTCCA                     |
| Dbp mRNA rev      | TGTACCTCCGGCTCCAGTA                      |
| Dbp mRNA probe    | FAM-CTCATCCTTCTGTTCCCTCAGGCACC-TAMRA     |
| Gys2 mRNA fwd     | CATGACCGAGAAGCTAACGA                     |
| Gys2 mRNA rev     | ATGACGTGTTTACCGTCTGC                     |
| Gys2 mRNA probe   | FAM-TCTGTACCTCCTTTAAGAACCAGGCA-TAMRA     |
| Gys2 pre fwd      | AGGAACCGAACCATTTCAGAC                    |
| Gys2 pre rev      | CACTGTCCCTCACATCTGCT                     |
| Gys2 pre probe    | FAM-CTCCGCCGACACTTCAGGCC-TAMRA           |
| March8 mRNA fwd   | GATCTCTGCCATCCCTTCTC                     |
| March8 mRNA rev   | GTTGCTTGGATGACTCATGG                     |
| March8 mRNA probe | FAM-TGTCCCAAAGTCTTCTCATTCTGCTCC-TAMRA    |
| March8 pre fwd    | TTTCTGCCTCAGCTTTCCTT                     |
| March8 pre rev    | ACTGGGTTCCCTTCTTTCCT                     |
| March8 pre probe  | FAM-CACATGACTGGGCGCCAACA-TAMRA           |
| Cry1 mRNA fwd     | CTGGCGTGGAAGTCATCGT                      |
| Cry1 mRNA rev     | CTGTCCGCCATTGAGTTCTATG                   |
| Cry1 mRNA probe   | FAM-CGCATTTACATACACTGTATGACCTGGACA-TAMRA |
| Cry1 pre fwd      | CTTCAACCACGCCTAAGACA                     |
| Cry1 pre rev      | GGAGCTTGTTTCCATCCAAT                     |
| Cry1 pre probe    | FAM-TCACTCCCATTTACCCAACCCATTG-TAMRA      |
| Qdpr mRNA fwd     | AGCTCCTGGACACCCTTAGA                     |
| Qdpr mRNA rev     | TTAGGCTTCCTGAGTTTGGC                     |
| Qdpr mRNA probe   | FAM-TCCAGTCATGGAAGGTTTCCACCA-TAMRA       |
| Qdpr pre fwd      | CCCAGTCTCCAAGGATCTA                      |
| Qdpr pre rev      | GTTAGCAGAAGCAGCACAGC                     |
| Qdpr pre probe    | FAM-TCCCAGGAGATCCTTTGCCCA-TAMRA          |
| Cry2 mRNA probe   | FAM-CCCGGACTACAAACAGACGCGA-TAMRA         |
| Cry2 mRNA fwd     | ACCGATGGAGGTTTCTACTG                     |
| Cry2 mRNA rev     | AGCCTTGGGAACACATCAG                      |
| Cry2 pre fwd      | GCCTGGCTTGCTATAGTTCC                     |
| Cry2 pre rev      | ATTCAGTTGCCTTGCCCTAC                     |
| Cry2 pre probe    | FAM-TTTGGCCACTGCAGCCAAGC-TAMRA           |
| Per1 mRNA fwd     | ACCAGCGTGCATGATGACATAC                   |
| Per1 mRNA rev     | CTCTCCCGGTCTTGCTTCAG                     |
| Per1 mRNA probe   | FAM-CCGTCCAGGGATGCAGCCTCTG-TAMRA         |
| Per1 pre fwd      | TGTCTTCCTCCCTCCAATTC                     |
| Per1 pre rev      | GTGGCCAACAGCAAGAACTA                     |
| Per1 pre probe    | FAM-ACATCACGACCGGCACGAGG-TAMRA           |
| Per2 mRNA fwd     | ATGCTCGCCATCCACAAGA                      |
| Per2 mRNA rev     | GCGGAATCGAATGGGAGAAT                     |
| Per2 mRNA probe   | FAM-ATCCTACAGGCCGGTGGACAGCC-TAMRA        |
| Per2 pre fwd      | CGCACACATTGTAAGATCCC                     |
| Per2 pre rev      | TTTGCTGGGTTGTGACTAGC                     |

|                   |                                             |
|-------------------|---------------------------------------------|
| Per2 pre probe    | FAM-ACCAGCCGGCAAGAACAGCC-TAMRA              |
| Nr1d1 mRNA fwd    | GTGACCTTTCTCAGCACGAC                        |
| Nr1d1 mRNA rev    | GTTGAACAACGATGCAAAGC                        |
| Nr1d1 mRNA probe  | FAM-AGCACCTCAAAGGTGCCAGCC-TAMRA             |
| Nr1d1 pre fwd     | GGTTGCCCTGCCTGGTTTA                         |
| Nr1d1 pre rev     | TGCCACCGAGTCGACAGAA                         |
| Nr1d1 pre probe   | FAM-CACATGTCTTGCTCACCCACTGACACA-TAMRA       |
| Rorc mRNA fwd     | AGTCCTTCCGAGAGACATGC                        |
| Rorc mRNA rev     | TCCCACATTGACTTCCTCTG                        |
| Rorc mRNA probe   | FAM-CCTTCTACGGCAGCGCACCA-TAMRA              |
| Rorc pre fwd      | GCTAATGGGCTTTCTGGAAC                        |
| Rorc pre rev      | GCATGCAGTCAGTATTTGGG                        |
| Rorc pre probe    | FAM-CTGGCCCTAGGCACCCTGGA-TAMRA              |
| Nfil3 mRNA fwd    | TGACCTGGAGAAACATGGAA                        |
| Nfil3 mRNA rev    | CGATTTGAGGGACCAATCTT                        |
| Nfil3 mRNA probe  | FAM-ATGGCCCATTCCTCCCTCCC-TAMRA              |
| Nfil3 pre fwd     | AAGTAGGGCAATCTCAGCGT                        |
| Nfil3 pre rev     | AAGACACACATTTGGCAAGC                        |
| Nfil3 pre probe   | FAM-TCGGTCGTCACITTTCCGGCTT-TAMRA            |
| Nr1d2 mRNA fwd    | AGTAGGTGGATGTTCTCAGACTGAGA                  |
| Nr1d2 mRNA rev    | ATGGAGACTTGCTCATAGGACACAC                   |
| Nr1d2 mRNA probe  | FAM-CAGAAATAGTTACCTGTGCAACACTGGAGGGAG-TAMRA |
| Nr1d2 pre fwd     | TCAGTTCTTTCTTGGGCCTT                        |
| Nr1d2 pre rev     | AACCTAAACCACGGAAATGC                        |
| Nr1d2 pre probe   | FAM-TGCCATCCCAGAGGGCAACA-TAMRA              |
| Tef mRNA fwd      | GCCGAGCTTCGCAAGGA                           |
| Tef mRNA rev      | ACAGGTTACAAGGGCCCGTACT                      |
| Tef mRNA probe    | FAM-ACACGATGGTCTTGCACTTGCCCA-TAMRA          |
| Tef pre fwd       | TGGGAATCACAATAGCAGGA                        |
| Tef pre rev       | CAAATACCCAGGCCAAGTCT                        |
| Tef pre probe     | FAM-CGGGCTTCATCGAATTGCC-TAMRA               |
| Bhlhb3 mRNA fwd   | GCGAGACGATACCAAGGATAC                       |
| Bhlhb3 mRNA rev   | TCAGATGTTGCGGGCAGTAAA                       |
| Bhlhb3 mRNA probe | FAM-CCGAATTAATGAATGCATTGCTCAGC-TAMRA        |
| Bhlhb3 pre fwd    | GAAACTCTGCCCGCAAATA                         |
| Bhlhb3 pre rev    | GGAGTATCCAGCAAGCCACT                        |
| Bhlhb3 pre probe  | FAM-CCAGCCCTGAGCTTTCCTAACTGTG-TAMRA         |
