# Supplementary material for: Genome-Wide and Phase-Specific DNA-Binding Rhythms of BMAL1 Control Circadian Output Functions in Mouse Liver
Source: PubMed Central journal article supplement (PMC3043000; doi:10.1371/journal.pbio.1000595), 2011-02-22
Supplement: pbio.1000595.s016.pdf [file pbio.1000595.s016.pdf]

**Table S8: Annealing primers for EMSA.**

| Name           | Sequence 5'->3'                                      |
|----------------|------------------------------------------------------|
| Per2 fwd       | CTAGCCGGT <u>CACGT</u> TTTCCACTATGTGACAC             |
| Per2 rev       | TCGAGTGTACATAGTGGAAAACGTGACCGG                       |
| Dbp-P fwd      | CTAGCATAGC <u>CACGCG</u> CAAAGC <u>CATGTG</u> CTTC   |
| Dbp-P rev      | TCGAGAAGCACATGGCTTTGCGCGTGCTATG                      |
| Dbp-I2 fwd     | CTAGCGACT <u>CACGTGGCG</u> AGGGAATGTGCAGC            |
| Dbp-I2 rev     | TCGAGCTGCACATTCCCTCGCCACGTGAGTCG                     |
| sp6 fwd        | CTAGCTGCT <u>CACGTGT</u> CGCGAA <u>ACGTG</u> ACGC    |
| sp6 rev        | TCGAGCGTCACGTTTTCGCGACACGTGAGCAG                     |
| sp7 fwd        | CTAGCTGCT <u>CACGTGT</u> CTGCGAA <u>ACGTG</u> ACGC   |
| sp7 rev        | TCGAGCGTCACGTTTTCGCGAGACACGTGAGCAG                   |
| sp8 fwd        | CTAGCTGCT <u>CACGTGT</u> CTGTGCGAA <u>ACGTG</u> ACGC |
| sp8 rev        | TCGAGCGTCACGTTTTCGACAGACACGTGAGCAG                   |
| sp9 fwd        | CTAGCTGCT <u>CACGTGT</u> CTGCTCGAA <u>ACGTG</u> ACGC |
| sp9 rev        | TCGAGCGTCACGTTTTCGAGCAGACACGTGAGCAG                  |
| mE1-E2 fwd     | CTAGCTGCTACCGTTTCTGCGAA <u>ACGTG</u> ACGC            |
| mE1-E2 rev     | TCGAGCGTCACGTTTTCGAGAACCGGTAGCAG                     |
| E1-mE2 fwd     | CTAGCTGCT <u>CACGTGT</u> CTGCGATGGAACACGC            |
| E1-mE2 rev     | TCGAGCGTGTTCCATCGCAGACACGTGAGCAG                     |
| mE1-mE2 fwd    | CTAGCTGCTACCGTTTCTGCGATGGAACACGC                     |
| mE1-mE2 rev    | GACGATGGCCAAGACGCTACCTTGTGCGAGCT                     |
| sp7 2D gel fwd | CTAGCTGC                                             |
| sp7 2D gel rev | CGT <u>CACGT</u> TTTCGCGAGAC <u>CAGTG</u> AGCAGCTAG  |
