# Supplementary material for: Genome-Wide and Phase-Specific DNA-Binding Rhythms of BMAL1 Control Circadian Output Functions in Mouse Liver
Source: PLoS Biol. 2011 Feb 22;9(2):e1000595. doi: 10.1371/journal.pbio.1000595 (PMC3043000; doi:10.1371/journal.pbio.1000595)
Supplement: Table S1 — Sequencing data: number of sequenced and non-redundant tags at each time point. (0.05 MB PDF) [file pbio.1000595.s009.pdf]

**Table S1. Sequencing data: number of sequenced and non-redundant tags at each timepoint.**

|                                           | Input | ZT2   | ZT6   | ZT10  | ZT14  | ZT18  | ZT22  |
|-------------------------------------------|-------|-------|-------|-------|-------|-------|-------|
| # tags mapped [in millions]               | 39.3  | 56.8  | 71.5  | 54.4  | 74.4  | 93.2  | 54.7  |
| # non-redundant unique tags [in millions] | 18    | 24.5  | 18.8  | 26.8  | 31.3  | 26.6  | 25.1  |
| # tag number in all 2049 sites            | 10090 | 60391 | 77438 | 57551 | 30025 | 10927 | 30786 |
