# Supplementary material for: Genome-Wide and Phase-Specific DNA-Binding Rhythms of BMAL1 Control Circadian Output Functions in Mouse Liver
Source: PLoS Biol. 2011 Feb 22;9(2):e1000595. doi: 10.1371/journal.pbio.1000595 (PMC3043000; doi:10.1371/journal.pbio.1000595)
Supplement: Table S2 — Functional annotation clustering of putative BMAL1 targets using DAVID tools. These annotations link the sites to the closest gene irrespective of the distance. In total, 1,551 out of 2,049 sites have a functional annotation. For details regarding the positions and binding strength of these sites, see Text S2. For the small clusters, we list the gene symbols in the most significant subcategory. (0.12 MB PDF) [file pbio.1000595.s010.pdf]

**Table S2. Functional Annotation Clustering of putative BMAL1 targets using DAVID tools.**

|                                                                                                                                |                                                                 |     |          |          |
|--------------------------------------------------------------------------------------------------------------------------------|-----------------------------------------------------------------|-----|----------|----------|
| <b>Cluster 1</b>                                                                                                               | <b>Enrichment Score: 7.570281784314562</b>                      |     |          |          |
| Category                                                                                                                       | Term                                                            | #   | P        | B        |
| INTERPRO                                                                                                                       | IPR001723:Steroid hormone receptor                              | 18  | 3.51E-09 | 5.82E-06 |
| INTERPRO                                                                                                                       | IPR008946:Nuclear hormone receptor, ligand-binding              | 18  | 5.06E-09 | 4.18E-06 |
| INTERPRO                                                                                                                       | IPR000536:Nuclear hormone receptor, ligand-binding, core        | 18  | 5.06E-09 | 4.18E-06 |
| GOTERM MF FAT                                                                                                                  | GO:0003707~steroid hormone receptor activity                    | 18  | 1.19E-08 | 1.18E-05 |
| SMART                                                                                                                          | SM00430:HOLI                                                    | 18  | 1.47E-08 | 4.43E-06 |
| <i>Esrra, Esrrg, Hnf4a, Hnf4g, Nr0b2, Nr1d1, Nr1d2, Nr1h4, Nr1i2, Nr2f2, Nr3c2, Nr5a2, Ppara, Rara, Rarb, Rora, Rorc, Thra</i> |                                                                 |     |          |          |
| <b>Cluster 2</b>                                                                                                               | <b>Enrichment Score: 5.385647810701173</b>                      |     |          |          |
| Category                                                                                                                       | Term                                                            | #   | P        | B        |
| GOTERM BP FAT                                                                                                                  | GO:0006641~triglyceride metabolic process                       | 13  | 2.02E-06 | 9.87E-04 |
| GOTERM BP FAT                                                                                                                  | GO:0006639~acylglycerol metabolic process                       | 14  | 2.64E-06 | 1.11E-03 |
| GOTERM BP FAT                                                                                                                  | GO:0006662~glycerol ether metabolic process                     | 14  | 4.66E-06 | 1.52E-03 |
| GOTERM BP FAT                                                                                                                  | GO:0006638~neutral lipid metabolic process                      | 14  | 4.66E-06 | 1.52E-03 |
| GOTERM BP FAT                                                                                                                  | GO:0018904~organic ether metabolic process                      | 14  | 1.02E-05 | 2.14E-03 |
| <i>Agpat6, Apoa5, Dgat2, G6pc, Insig1, Insig2, Mogat2, Pck1, Pcsk9, Pnpla2, Pnpla3, Sirt1, Slc22a4</i>                         |                                                                 |     |          |          |
| <b>Cluster 3</b>                                                                                                               | <b>Enrichment Score: 5.076823004927006</b>                      |     |          |          |
| Category                                                                                                                       | Term                                                            | #   | P        | B        |
| SP PIR KEYWORDS                                                                                                                | transcription regulation                                        | 156 | 6.36E-08 | 1.46E-05 |
| SP PIR KEYWORDS                                                                                                                | Transcription                                                   | 161 | 1.91E-05 | 9.73E-04 |
| GOTERM BP FAT                                                                                                                  | GO:0045449~regulation of transcription                          | 194 | 3.59E-05 | 5.54E-03 |
| GOTERM BP FAT                                                                                                                  | GO:0006350~transcription                                        | 157 | 1.13E-04 | 1.10E-02 |
| <b>Cluster 4</b>                                                                                                               | <b>Enrichment Score: 4.826858791167763</b>                      |     |          |          |
| Category                                                                                                                       | Term                                                            | #   | P        | B        |
| GOTERM BP FAT                                                                                                                  | GO:0016481~negative regulation of transcription                 | 51  | 1.52E-06 | 1.11E-03 |
| GOTERM BP FAT                                                                                                                  | GO:0045934~negative regulation of nucleobase, ...               | 52  | 4.53E-06 | 1.66E-03 |
| GOTERM BP FAT                                                                                                                  | GO:0010629~negative regulation of gene expression               | 53  | 5.32E-06 | 1.56E-03 |
| GOTERM BP FAT                                                                                                                  | GO:0051172~negative regulation of nitrogen compound ...         | 52  | 6.06E-06 | 1.48E-03 |
| GOTERM BP FAT                                                                                                                  | GO:0031327~negative regulation of cellular biosynthetic process | 54  | 9.87E-06 | 2.23E-03 |
| <b>Cluster 5</b>                                                                                                               | <b>Enrichment Score: 4.579854703068408</b>                      |     |          |          |
| Category                                                                                                                       | Term                                                            | #   | P        | B        |
| INTERPRO                                                                                                                       | IPR004827:Basic-leucine zipper (bZIP) transcription factor      | 15  | 6.02E-06 | 1.99E-03 |
| SMART                                                                                                                          | SM00338:BRLZ                                                    | 15  | 1.38E-05 | 1.39E-03 |
| UP_SEQ_FEATURE                                                                                                                 | domain:Leucine-zipper                                           | 20  | 2.19E-04 | 8.71E-02 |
| <b>Cluster 6</b>                                                                                                               | <b>Enrichment Score: 4.172511153755323</b>                      |     |          |          |
| Category                                                                                                                       | Term                                                            | #   | P        | B        |
| SP PIR KEYWORDS                                                                                                                | nucleotide-binding                                              | 154 | 4.33E-06 | 3.96E-04 |
| SP PIR KEYWORDS                                                                                                                | atp-binding                                                     | 126 | 6.73E-06 | 3.85E-04 |
| GOTERM MF FAT                                                                                                                  | GO:0000166~nucleotide binding                                   | 196 | 3.49E-05 | 8.60E-03 |
| GOTERM MF FAT                                                                                                                  | GO:0005524~ATP binding                                          | 137 | 6.36E-05 | 1.25E-02 |
| GOTERM MF FAT                                                                                                                  | GO:0030554~adenyl nucleotide binding                            | 143 | 1.04E-04 | 1.45E-02 |

|                                                                                                                                                                                                                            |                                                                |     |          |          |
|----------------------------------------------------------------------------------------------------------------------------------------------------------------------------------------------------------------------------|----------------------------------------------------------------|-----|----------|----------|
|                                                                                                                                                                                                                            |                                                                |     |          |          |
| <b>Cluster 7</b>                                                                                                                                                                                                           | <b>Enrichment Score: 3.970366701916962</b>                     |     |          |          |
| Category                                                                                                                                                                                                                   | Term                                                           | #   | P        | B        |
| GOTERM_BP_FAT                                                                                                                                                                                                              | GO:0045893~positive regulation of transcription, DNA-dependent | 52  | 1.69E-05 | 3.11E-03 |
| GOTERM_BP_FAT                                                                                                                                                                                                              | GO:0051254~positive regulation of RNA metabolic process        | 52  | 2.06E-05 | 3.36E-03 |
| GOTERM_BP_FAT                                                                                                                                                                                                              | GO:0045941~positive regulation of transcription                | 56  | 4.06E-05 | 5.95E-03 |
| GOTERM_BP_FAT                                                                                                                                                                                                              | GO:0010628~positive regulation of gene expression              | 57  | 4.46E-05 | 5.69E-03 |
| GOTERM_BP_FAT                                                                                                                                                                                                              | GO:0010604~positive regulation of macromolecule metabolic ...  | 68  | 1.04E-04 | 1.05E-02 |
|                                                                                                                                                                                                                            |                                                                |     |          |          |
| <b>Cluster 8</b>                                                                                                                                                                                                           | <b>Enrichment Score: 3.683169135128673</b>                     |     |          |          |
| Category                                                                                                                                                                                                                   | Term                                                           | #   | P        | B        |
| GOTERM_BP_FAT                                                                                                                                                                                                              | GO:0005996~monosaccharide metabolic process                    | 29  | 6.67E-05 | 7.50E-03 |
| GOTERM_BP_FAT                                                                                                                                                                                                              | GO:0019318~hexose metabolic process                            | 25  | 3.50E-04 | 2.67E-02 |
| GOTERM_BP_FAT                                                                                                                                                                                                              | GO:0006006~glucose metabolic process                           | 22  | 3.82E-04 | 2.84E-02 |
| <i>Aldoat2, Aldob, B4galt1, Car5a, Csgalnact1, Fbp1, G6pc, G6pc3, Gbe1, Gm10481, Gne, Gnptat1, Gys2, Hibadh, Il6st, Ldha, Man2a1, Pck1, Pcx, Pdk1, Pfkfb3, Pfkf, Pgm2l1, Phkb, Ppara, Ppp1r3b, Ppp1r3c, Ugt1a10, Wdtd1</i> |                                                                |     |          |          |
|                                                                                                                                                                                                                            |                                                                |     |          |          |
| <b>Cluster 9</b>                                                                                                                                                                                                           | <b>Enrichment Score: 3.261796532650017</b>                     |     |          |          |
| Category                                                                                                                                                                                                                   | Term                                                           | #   | PValue   | B        |
| INTERPRO                                                                                                                                                                                                                   | IPR001849:Pleckstrin homology                                  | 34  | 1.80E-04 | 4.85E-02 |
| SMART                                                                                                                                                                                                                      | SM00233:PH                                                     | 34  | 6.37E-04 | 4.70E-02 |
| UP_SEQ_FEATURE                                                                                                                                                                                                             | domain:PH                                                      | 28  | 1.43E-03 | 4.05E-01 |
|                                                                                                                                                                                                                            |                                                                |     |          |          |
| <b>Cluster 10</b>                                                                                                                                                                                                          | <b>Enrichment Score: 2.760908956897479</b>                     |     |          |          |
| Category                                                                                                                                                                                                                   | Term                                                           | #   | P        | B        |
| UP_SEQ_FEATURE                                                                                                                                                                                                             | zinc finger region:PHD-type 1                                  | 11  | 1.47E-05 | 2.12E-02 |
| UP_SEQ_FEATURE                                                                                                                                                                                                             | zinc finger region:PHD-type 2                                  | 10  | 3.69E-05 | 3.52E-02 |
| INTERPRO                                                                                                                                                                                                                   | IPR019787:Zinc finger, PHD-finger                              | 13  | 5.81E-03 | 4.53E-01 |
| INTERPRO                                                                                                                                                                                                                   | IPR001965:Zinc finger, PHD-type                                | 13  | 1.44E-02 | 6.63E-01 |
| SMART                                                                                                                                                                                                                      | SM00249:PHD                                                    | 13  | 2.42E-02 | 4.90E-01 |
|                                                                                                                                                                                                                            |                                                                |     |          |          |
| <b>Cluster 11</b>                                                                                                                                                                                                          | <b>Enrichment Score: 2.6581652848216746</b>                    |     |          |          |
| Category                                                                                                                                                                                                                   | Term                                                           | #   | P        | B        |
| GOTERM_BP_FAT                                                                                                                                                                                                              | GO:0046463~acylglycerol biosynthetic process                   | 6   | 6.95E-04 | 4.75E-02 |
| GOTERM_BP_FAT                                                                                                                                                                                                              | GO:0046460~neutral lipid biosynthetic process                  | 6   | 6.95E-04 | 4.75E-02 |
| GOTERM_BP_FAT                                                                                                                                                                                                              | GO:0046504~glycerol ether biosynthetic process                 | 6   | 1.07E-03 | 6.33E-02 |
| GOTERM_BP_FAT                                                                                                                                                                                                              | GO:0019432~triglyceride biosynthetic process                   | 5   | 1.11E-03 | 6.30E-02 |
| GOTERM_BP_FAT                                                                                                                                                                                                              | GO:0045017~glycerolipid biosynthetic process                   | 8   | 8.97E-02 | 7.41E-01 |
| <i>Agpat6, Dgat2, Mogat1, Mogat2, Pck1, Pnpla3</i>                                                                                                                                                                         |                                                                |     |          |          |
|                                                                                                                                                                                                                            |                                                                |     |          |          |
| <b>Cluster 12</b>                                                                                                                                                                                                          | <b>Enrichment Score: 2.574218919122059</b>                     |     |          |          |
| Category                                                                                                                                                                                                                   | Term                                                           | #   | P        | B        |
| GOTERM_MF_FAT                                                                                                                                                                                                              | GO:0043169~cation binding                                      | 307 | 2.12E-03 | 1.10E-01 |
| GOTERM_MF_FAT                                                                                                                                                                                                              | GO:0043167~ion binding                                         | 310 | 2.38E-03 | 1.17E-01 |
| GOTERM_MF_FAT                                                                                                                                                                                                              | GO:0046872~metal ion binding                                   | 302 | 3.76E-03 | 1.56E-01 |
|                                                                                                                                                                                                                            |                                                                |     |          |          |
| <b>Cluster 13</b>                                                                                                                                                                                                          | <b>Enrichment Score: 2.4615864721249996</b>                    |     |          |          |
| Category                                                                                                                                                                                                                   | Term                                                           | #   | P        | B        |

|                                                   |                                                            |    |          |          |
|---------------------------------------------------|------------------------------------------------------------|----|----------|----------|
| GOTERM_BP_FAT                                     | GO:0006094~gluconeogenesis                                 | 7  | 1.49E-03 | 8.08E-02 |
| GOTERM_BP_FAT                                     | GO:0046364~monosaccharide biosynthetic process             | 8  | 3.66E-03 | 1.51E-01 |
| GOTERM_BP_FAT                                     | GO:0006090~pyruvate metabolic process                      | 7  | 5.11E-03 | 1.89E-01 |
| GOTERM_BP_FAT                                     | GO:0019319~hexose biosynthetic process                     | 7  | 5.11E-03 | 1.89E-01 |
| <i>Aldob, Car5a, Fbp1, G6pc, G6pc3, Pck1, Pcx</i> |                                                            |    |          |          |
|                                                   |                                                            |    |          |          |
| <b>Cluster 14</b>                                 | <b>Enrichment Score: 2.374480605027989</b>                 |    |          |          |
| Category                                          | Term                                                       | #  | P        | B        |
| INTERPRO                                          | IPR001610:PAC motif                                        | 8  | 1.05E-03 | 1.75E-01 |
| SMART                                             | SM00086:PAC                                                | 8  | 1.62E-03 | 7.82E-02 |
| INTERPRO                                          | IPR000014:PAS                                              | 8  | 3.80E-03 | 3.84E-01 |
| INTERPRO                                          | IPR013655:PAS fold-3                                       | 6  | 4.78E-03 | 4.33E-01 |
| SMART                                             | SM00091:PAS                                                | 8  | 5.73E-03 | 2.20E-01 |
|                                                   |                                                            |    |          |          |
| <b>Cluster 15</b>                                 | <b>Enrichment Score: 2.328696704988734</b>                 |    |          |          |
| Category                                          | Term                                                       | #  | P        | B        |
| GOTERM_BP_FAT                                     | GO:0048514~blood vessel morphogenesis                      | 25 | 3.24E-03 | 1.43E-01 |
| GOTERM_BP_FAT                                     | GO:0001944~vasculature development                         | 29 | 4.85E-03 | 1.82E-01 |
| GOTERM_BP_FAT                                     | GO:0001568~blood vessel development                        | 28 | 6.57E-03 | 2.28E-01 |
|                                                   |                                                            |    |          |          |
| <b>Cluster 16</b>                                 | <b>Enrichment Score: 2.2269434033112434</b>                |    |          |          |
| Category                                          | Term                                                       | #  | P        | B        |
| GOTERM_BP_FAT                                     | GO:0042304~regulation of fatty acid biosynthetic process   | 5  | 1.89E-03 | 9.59E-02 |
| GOTERM_BP_FAT                                     | GO:0019217~regulation of fatty acid metabolic process      | 6  | 6.90E-03 | 2.32E-01 |
| GOTERM_BP_FAT                                     | GO:0010565~regulation of cellular ketone metabolic process | 6  | 1.60E-02 | 3.48E-01 |
| <i>Hnf4a, Insig1, Insig2, Scap, Wdcl</i>          |                                                            |    |          |          |
|                                                   |                                                            |    |          |          |
| <b>Cluster 17</b>                                 | <b>Enrichment Score: 2.02601777896621</b>                  |    |          |          |
| Category                                          | Term                                                       | #  | P        | B        |
| INTERPRO                                          | IPR001841:Zinc finger, RING-type                           | 32 | 3.49E-03 | 3.83E-01 |
| SMART                                             | SM00184:RING                                               | 32 | 9.69E-03 | 3.08E-01 |
| INTERPRO                                          | IPR017907:Zinc finger, RING-type, conserved site           | 26 | 2.47E-02 | 7.60E-01 |
|                                                   |                                                            |    |          |          |
| <b>Cluster 18</b>                                 | <b>Enrichment Score: 2.012102589102119</b>                 |    |          |          |
| Category                                          | Term                                                       | #  | P        | B        |
| GOTERM_BP_FAT                                     | GO:0006468~protein amino acid phosphorylation              | 60 | 7.08E-03 | 2.32E-01 |
| GOTERM_BP_FAT                                     | GO:0016310~phosphorylation                                 | 65 | 1.02E-02 | 2.82E-01 |
| GOTERM_BP_FAT                                     | GO:0006793~phosphorus metabolic process                    | 76 | 1.11E-02 | 2.95E-01 |
| GOTERM_BP_FAT                                     | GO:0006796~phosphate metabolic process                     | 76 | 1.11E-02 | 2.95E-01 |

The annotations link the sites to the closest gene irrespective of the distance. In total, 1551 out of 2049 sites have a functional annotation. For details regarding the positions and strength of these sites, we refer to the supplemental file BMAL1\_sites.txt. For the small clusters, we list the genes symbols in the most significant subcategory.<sup>1</sup>P = p-value, B = Benjamini corrected p-value.
