# Supplementary material for: Genome-Wide and Phase-Specific DNA-Binding Rhythms of BMAL1 Control Circadian Output Functions in Mouse Liver
Source: PLoS Biol. 2011 Feb 22;9(2):e1000595. doi: 10.1371/journal.pbio.1000595 (PMC3043000; doi:10.1371/journal.pbio.1000595)
Supplement: Table S3 — Putative BMAL1 targets with transcription factor activity (DAVID, GO:003700). Additional columns include the rank of BMAL1 binding strength, the p-value for cyclic mRNA expression (data as in Figure 6; significant values, p<0.05, are in bold), and phase of mRNA expression. For the nuclear receptors, we also indicate results for mRNA expression patterns by real-time PCR in mouse liver [27]. According to those analyses, all 18 bound receptors are expressed and 9/18 show circadian accumulation. (0.12 MB PDF) [file pbio.1000595.s011.pdf]

**Table S3. Putative BMAL1 targets with transcription factor activity (DAVID, GO:003700).**

| Ensembl transcript ID              | Symbol  | Name                                                                                  | mRNA (qPCR)  | rank | p-val         | phase |
|------------------------------------|---------|---------------------------------------------------------------------------------------|--------------|------|---------------|-------|
| <b>Nuclear receptor</b>            |         |                                                                                       |              |      |               |       |
| ENSMUST00000064941                 | Nr1d1   | nuclear receptor subfamily 1, group D, member 1                                       | Rhythmic     | 2    | <b>0.0025</b> | 5.9   |
| ENSMUST00000143308                 | Nr1d2   | nuclear receptor subfamily 1, group D, member 2                                       | Rhythmic     | 5    | <b>0.0044</b> | 9.6   |
| ENSMUST00000029795                 | Rorc    | RAR-related orphan receptor gamma                                                     | Rhythmic     | 17   | <b>0.0021</b> | 19.7  |
| ENSMUST00000126697                 | Nr3c2   | nuclear receptor subfamily 3, group C, member 2                                       | Non-Rhythmic | 57   | <b>0.0133</b> | 7.0   |
| ENSMUST00000108393                 | Hnf4g   | hepatocyte nuclear factor 4, gamma                                                    | Non-Rhythmic | 146  | 0.2121        | 5.6   |
| ENSMUST00000113432                 | Esrra   | estrogen related receptor, alpha                                                      | Rhythmic     | 228  | 0.1329        | 14.8  |
| ENSMUST00000032768                 | Nr2f2   | nuclear receptor subfamily 2, group F, member 2                                       | Non-Rhythmic | 296  | <b>0.0298</b> | 9.9   |
| ENSMUST00000136453                 | Ppara   | peroxisome proliferator activated receptor alpha                                      | Rhythmic     | 302  | 0.0549        | 9.9   |
| ENSMUST00000107473                 | Rara    | retinoic acid receptor, alpha                                                         | Rhythmic     | 836  | 0.2703        | 16.3  |
| ENSMUST00000042706                 | Nr0b2   | nuclear receptor subfamily 0, group B, member 2                                       | Rhythmic     | 1539 | 0.1962        | 23.8  |
| ENSMUST00000023504                 | Nr1i2   | nuclear receptor subfamily 1, group I, member 2                                       | Non-Rhythmic | 1591 | 0.1590        | 11.4  |
| ENSMUST00000143507                 | Rora    | RAR-related orphan receptor alpha                                                     | Non-Rhythmic | 1655 | 0.0818        | 18.3  |
| ENSMUST00000124072                 | Thra    | thyroid hormone receptor alpha                                                        | Rhythmic     | 1694 | <b>0.0052</b> | 3.2   |
| ENSMUST00000105297                 | Nr1h4   | nuclear receptor subfamily 1, group H, member 4                                       | Non-Rhythmic | 1715 | 0.3493        | 13.0  |
| ENSMUST00000051130                 | Hnf4a   | hepatic nuclear factor 4, alpha                                                       | Non-Rhythmic | 1746 | <b>0.0070</b> | 13.9  |
| ENSMUST00000112609                 | Rarb    | retinoic acid receptor, beta                                                          | Non-Rhythmic | 1789 | 0.8635        | 6.3   |
| ENSMUST00000127489                 | Esrrg   | estrogen-related receptor gamma                                                       | Rhythmic     | 1942 | 0.6643        | 4.6   |
| ENSMUST00000027649                 | Nr5a2   | nuclear receptor subfamily 5, group A, member 2                                       | Non-Rhythmic | 1960 | 0.3627        | 23.8  |
| <b>Basic-leucine zipper (bZIP)</b> |         |                                                                                       |              |      |               |       |
| ENSMUST00000155439                 | Dbp     | D site albumin promoter binding protein                                               |              | 4    | <b>0.0013</b> | 9.1   |
| ENSMUST00000107883                 | Hlf     | hepatic leukemia factor                                                               |              | 10   | <b>0.0035</b> | 12.6  |
| ENSMUST00000023024                 | Tef     | thyrotroph embryonic factor                                                           |              | 14   | <b>0.0001</b> | 11.4  |
| ENSMUST00000071065                 | Nfil3   | similar to NFIL3/E4BP4 transcription factor; nuclear factor, interleukin 3, regulated |              | 55   | <b>0.0004</b> | 22.0  |
| ENSMUST00000064922                 | Junb    | Jun-B oncogene                                                                        |              | 60   | 0.0956        | 5.2   |
| ENSMUST00000109104                 | Maf     | similar to c-Maf long form                                                            |              | 111  | 0.2219        | 11.0  |
| ENSMUST00000152371                 | Nfe2l2  | nuclear factor, erythroid derived 2, like 2                                           |              | 129  | 0.2674        | 12.3  |
| ENSMUST00000108828                 | Atf7    | activating transcription factor 7                                                     |              | 471  | 0.6786        | 14.3  |
| ENSMUST00000156958                 | Bach1   | BTB and CNC homology 1                                                                |              | 509  | 0.2342        | 10.0  |
| ENSMUST00000099126                 | Mafb    | v-maf musculoaponeurotic fibrosarcoma oncogene family, protein B (avian)              |              | 824  | 0.1211        | 12.0  |
| ENSMUST00000151577                 | Mafk    | v-maf musculoaponeurotic fibrosarcoma oncogene family, protein K (avian)              |              | 936  | 0.1959        | 6.5   |
| ENSMUST00000015605                 | Atf6b   | activating transcription factor 6 beta                                                |              | 965  | 0.2015        | 21.4  |
| ENSMUST00000132438                 | Nfe2    | nuclear factor, erythroid derived 2                                                   |              | 1251 | 0.0522        | 1.4   |
| ENSMUST00000048384                 | Creb3l3 | cAMP responsive element binding protein 3-like 3                                      |              | 1501 | 0.0798        | 11.3  |
| ENSMUST00000063084                 | Xbp1    | X-box binding protein 1                                                               |              | 1817 | 0.0883        | 16.8  |

| Basic helix-loop-helix |         |                                                                                              |      |               |      |
|------------------------|---------|----------------------------------------------------------------------------------------------|------|---------------|------|
| ENSMUST00000105345     | Tcf3    | transcription factor E2a                                                                     | 214  | 0.1032        | 3.8  |
| ENSMUST00000112273     | Epas1   | endothelial PAS domain protein 1; similar to Endothelial PAS domain protein 1                | 390  | 0.2073        | 14.1 |
| ENSMUST00000021530     | Hif1a   | hypoxia inducible factor 1, alpha subunit                                                    | 407  | 0.0687        | 8.9  |
| ENSMUST00000132150     | Mnt     | max binding protein                                                                          | 590  | 0.2315        | 22.4 |
| ENSMUST00000084703     | Arntl   | aryl hydrocarbon receptor nuclear translocator-like                                          | 1406 | <b>0.0005</b> | 21.9 |
| ENSMUST00000058636     | Helt    | Hey-like transcription factor (zebrafish)                                                    | 1466 | -             | -    |
| Zinc finger            |         |                                                                                              |      |               |      |
| ENSMUST00000032174     | Klf15   | Kruppel-like factor 15                                                                       | 52   | <b>0.0493</b> | 11.2 |
| ENSMUST00000038558     | Klf16   | Kruppel-like factor 16                                                                       | 185  | 0.1092        | 9.1  |
| ENSMUST00000020982     | Klf11   | Kruppel-like factor 11                                                                       | 343  | 0.5339        | 5.7  |
| ENSMUST00000028866     | Zc3h8   | zinc finger CCCH type containing 8                                                           | 669  | 0.0624        | 12.3 |
| ENSMUST00000098143     | Nfx1    | nuclear transcription factor, X-box binding 1                                                | 679  | <b>0.0125</b> | 7.8  |
| ENSMUST00000006762     | Snai3   | snail homolog 3 (Drosophila)                                                                 | 780  | 0.8176        | 11.6 |
| ENSMUST00000047734     | Zfp281  | zinc finger protein 281                                                                      | 1081 | <b>0.0028</b> | 10.9 |
| ENSMUST00000034629     | Hinfp   | similar to MBD2-interacting zinc finger; histone H4 transcription factor                     | 1092 | 0.5522        | 8.2  |
| ENSMUST00000018491     | Zkscan6 | zinc finger with KRAB and SCAN domains 6                                                     | 1564 | 0.7216        | 19.8 |
| ENSMUST00000114667     | Tshz1   | teashirt zinc finger family member 1                                                         | 1969 | 0.0947        | 12.6 |
| Homeobox               |         |                                                                                              |      |               |      |
| ENSMUST00000111429     | Pou2f1  | POU domain, class 2, transcription factor 1                                                  | 512  | 0.0513        | 4.5  |
| ENSMUST00000115145     | Onecut2 | one cut domain, family member 2                                                              | 1506 | 0.0849        | 10.8 |
| ENSMUST00000010319     | Prox1   | prospero-related homeobox 1                                                                  | 1761 | 0.2013        | 17.7 |
| ENSMUST00000109693     | Irx2    | similar to iroquois-class homeobox protein IRX2                                              | 1801 | 0.7377        | 19.2 |
| ENSMUST00000027878     | Prrx1   | paired related homeobox 1                                                                    | 1808 | 0.1990        | 18.0 |
| ENSMUST00000137697     | Satb1   | special AT-rich sequence binding protein 1                                                   | 2011 | 0.0429        | 3.3  |
| ENSMUST00000077337     | Irx1    | Iroquois related homeobox 1 (Drosophila)                                                     | 2037 | 0.2746        | 20.2 |
| SMAD domain            |         |                                                                                              |      |               |      |
| ENSMUST00000069557     | Smad5   | MAD homolog 5 (Drosophila)                                                                   | 601  | 0.0955        | 9.8  |
| ENSMUST00000025453     | Smad2   | MAD homolog 2 (Drosophila)                                                                   | 901  | 0.4373        | 5.9  |
| ENSMUST00000144323     | Smad6   | MAD homolog 6 (Drosophila)                                                                   | 1266 | 0.4842        | 20.8 |
| ENSMUST00000066091     | Smad1   | MAD homolog 1 (Drosophila)                                                                   | 2031 | 0.3675        | 0.0  |
| Winged helix           |         |                                                                                              |      |               |      |
| ENSMUST00000105501     | Foxo3   | forkhead box O3                                                                              | 217  | <b>0.0124</b> | 10.6 |
| ENSMUST00000111979     | Pax2    | paired box gene 2                                                                            | 361  | -             | -    |
| ENSMUST00000106114     | Foxk2   | forkhead box K2                                                                              | 925  | <b>0.0257</b> | 10.8 |
| ENSMUST00000079071     | Tfdp1   | transcription factor Dp 1; similar to Transcription factor Dp-1 (E2F dimerization partner 1) | 975  | 0.1035        | 12.5 |
| ENSMUST00000145869     | Etv6    | ets variant gene 6 (TEL oncogene)                                                            | 993  | 0.4587        | 19.7 |
| ENSMUST00000108920     | Irf1    | interferon regulatory factor 1                                                               | 998  | <b>0.0183</b> | 2.7  |

|                    |         |                                                                                   |      |               |      |
|--------------------|---------|-----------------------------------------------------------------------------------|------|---------------|------|
| ENSMUST00000034041 | Irf2    | interferon regulatory factor 2                                                    | 1283 | <b>0.0496</b> | 10.3 |
| ENSMUST00000140544 | Ets2    | E26 avian leukemia oncogene 2, 3' domain                                          | 1550 | 0.1107        | 6.8  |
| <b>Others</b>      |         |                                                                                   |      |               |      |
| ENSMUST00000131118 | Arid3a  | AT rich interactive domain 3A (BRIGHT-like)                                       | 116  | 0.6162        | 6.0  |
| ENSMUST00000035101 | Csrnp1  | cysteine-serine-rich nuclear protein 1                                            | 216  | <b>0.0400</b> | 9.8  |
| ENSMUST00000099070 | Nfix    | nuclear factor I/X                                                                | 281  | <b>0.0482</b> | 9.3  |
| ENSMUST00000112995 | Tsc22d3 | TSC22 domain family, member 3                                                     | 337  | <b>0.0169</b> | 16.8 |
| ENSMUST00000038107 | Cited2  | Cbp/p300-interacting transactivator, with Glu/Asp-rich carboxy-terminal domain, 2 | 427  | 0.4922        | 2.8  |
| ENSMUST00000152145 | Affl1   | AF4/FMR2 family, member 1                                                         | 810  | <b>0.0363</b> | 4.0  |
| ENSMUST00000098937 | Ecsit   | ECSIT homolog (Drosophila)                                                        | 865  | 0.3822        | 12.2 |
| ENSMUST00000152082 | Arap1   | ArfGAP with RhoGAP domain, ankyrin repeat and PH domain 1                         | 953  | <b>0.0272</b> | 2.9  |
| ENSMUST00000130911 | Nfyb    | nuclear transcription factor-Y beta                                               | 1042 | 0.1259        | 6.2  |
| ENSMUST00000078185 | Nfic    | nuclear factor I/C                                                                | 1094 | 0.1632        | 16.4 |
| ENSMUST00000079652 | Sox7    | SRY-box containing gene 7                                                         | 1231 | 0.3954        | 10.3 |
| ENSMUST00000107358 | Stat5b  | signal transducer and activator of transcription 5B                               | 1313 | <b>0.0020</b> | 1.7  |
| ENSMUST00000139138 | Ctnnb1  | catenin (cadherin associated protein), beta 1                                     | 1562 | 0.6917        | 21.9 |
| ENSMUST00000072460 | Mef2a   | similar to Myocyte enhancer factor 2A; myocyte enhancer factor 2A                 | 1689 | 0.2334        | 11.8 |

Additional columns include the rank of BMAL1 binding strength, the p-value for cyclic mRNA expression (data as in Fig. 6 significant values  $p < 0.05$  are in bold), and phase of mRNA expression given in hours. For the nuclear receptors, we also indicate results for mRNA expression patterns by real-time-PCR in mouse liver {Yang, 2006}. According to those all 18 bound receptors are expressed and 9/18 show circadian accumulation.
