# Supplementary material for: Genome-Wide and Phase-Specific DNA-Binding Rhythms of BMAL1 Control Circadian Output Functions in Mouse Liver
Source: PLoS Biol. 2011 Feb 22;9(2):e1000595. doi: 10.1371/journal.pbio.1000595 (PMC3043000; doi:10.1371/journal.pbio.1000595)
Supplement: Table S6 — TaqMan probes for ChIP-PCR measurements. (0.04 MB PDF) [file pbio.1000595.s014.pdf]

**Table S6. Taqman probes for ChIP-PCR measurements**

| <b>Name</b> | <b>Sequence 5'-&gt;3'</b>            |
|-------------|--------------------------------------|
| DbpI2 fwd   | TGGGACGCCTGGGTACAC                   |
| DbpI2 rev   | GGGAATGTGCAGCACTGGTT                 |
| DbpI2 probe | FAM-CCCTGATCCGACCTCCAGGCAA-TAMRA     |
| Per1 fwd    | AGCCCTCTCAGCCTATGAGAAAGT             |
| Per1 rev    | CCCGCCCTGCCTAAATCA                   |
| Per1 probe  | FAM-TTTAGGGCAGGGCTGGCATTGCG-TAMRA    |
| Gapdh fwd   | CATGGCCTCCGTGTTCTTA                  |
| Gapdh rev   | CCTGCTTCACCACCTTCTTGA                |
| Gapdh probe | FAM-CCGCCTGGAGAAACCTGCCAAGTATG-TAMRA |
