# Supplementary material for: Genome-Wide and Phase-Specific DNA-Binding Rhythms of BMAL1 Control Circadian Output Functions in Mouse Liver
Source: PLoS Biol. 2011 Feb 22;9(2):e1000595. doi: 10.1371/journal.pbio.1000595 (PMC3043000; doi:10.1371/journal.pbio.1000595)
Supplement: Table S9 — Annealing primers for transactivation assays. (0.05 MB PDF) [file pbio.1000595.s017.pdf]

**Table S9: Annealing primers for transactivation assays.**

| <b>Name</b>        | <b>Sequence 5'-&gt;3'</b>                    |
|--------------------|----------------------------------------------|
| Dbp-I2 WT Fwd      | GTACCACTCACGTGGCGAGGGAATGTGCAACTC            |
| Dbp-I2 WT Rev      | TCGAGAGTTGCACATTCCCTCGCCACGTGAGTG            |
| Dbp-I2 E1-mE2 Fwd  | GTACCACTCACGTGGCGAGGGTGAATCAACTC             |
| Dbp-I2 E1-mE2 Rev  | TCGAGAGTTGATTCCACCCTCGCCACGTGAGTG            |
| Dbp-I2 sp10 Fwd    | GTACCACTCACGTGGCGACTAGGGAATGTGCAC            |
| Dbp-I2 sp10 Rev    | TCGAGTGCACATTCCCTAGTCGCCACGTGAGTG            |
| Per2 WT Fwd        | GTACCGGTCACGTTTCCACTATGTGACTAGCC             |
| Per2 WT Rev        | TCGAGGCTAGTCACATAGTGGAACGTGACCG              |
| Per2 E1-mE2 Fwd    | GTACCGGTCACGTTTCCACTGGATTACTAGCC             |
| Per2 E1-mE2 Rev    | TCGAGGCTAGTAATCCAGTGGAACGTGACCG              |
| Per2 sp10 Fwd      | GTACCGGTCACGTTTCCCTAGCACTATGTGACC            |
| Per2 sp10 Rev      | TCGAGGTCACATAGTGCTAGGAAACGTGACCG             |
| Dbp-I2 mE1-E2 Fwd  | GTACCACTACCTGGGCGAGGGAATGTGCAACTC            |
| Dbp-I2 mE1-E2 Rev  | TCGAGAGTTGCACATTCCCTCGCCACGTTAGTG            |
| Dbp-I2 mE1-mE2 Fwd | GTACCACTACCTGGGCGAGGGTGAATCAACTC             |
| Dbp-I2 mE1-mE2 Rev | TCGAGAGTTGATTCCACCCTCGCCACGTTAGTG            |
| Dbp-I2 E1-E1 Fwd   | GTACCACTCACGTGGCGAGGGCACGTGCAACTC            |
| Dbp-I2 E1-E1 Rev   | TCGAGAGTTGCACGTGCCCTCGCCACGTGAGTG            |
| Dbp-I2 E2-E2 Fwd   | GTACCACTAATGTGGCGAGGGAATGTGCAACTC            |
| Dbp-I2 E2-E2 Rev   | TCGAGAGTTGCACATTCCCTCGCCACATTAGTG            |
| Dbp-I2sp20 Fwd     | GTACCACTCACGTGGCGAGGGGCGAGGGCGAGGGAATGTGCAC  |
| Dbp-I2 sp20 Rev    | TCGAGTGCACATTCCCTCGCCCTCGCCCTCGCCACGTGAGTG   |
| Dbp-I2 sp17 Fwd    | GTACCACTCACGTGGCGAGGGAGGGCGAGGGAATGTGCAGCGC  |
| Dbp-I2 sp17 Rev    | TCGAGCGCTGCACATTCCCTCGCCCTCCCTCGCCACGTGAGTG  |
| Dbp-I2 sp10 Fwd    | GTACCACTCACGTGGCGAGGGGCGAATGTGCAAGGGAGGGCGC  |
| Dbp-I2 sp10 Rev    | TCGAGCGCCCTCCCTCGTGCACATTCCCTCGCCACGTGAGTG   |
| Dbp-I2 sp8 Fwd     | GTACCACTCACGTGGCGAGGGGAATGTGCACGAGGGAGGGCGC  |
| Dbp-I2 sp8 Rev     | TCGAGCGCCCTCCCTCGTGCACATTCCCTCGCCACGTGAGTG   |
| Dbp-I2 sp7 Fwd     | GTACCACTCACGTGGCGAGGGAATGTGCAGCGAGGGAGGGCGC  |
| Dbp-I2 sp7 Rev     | TCGAGCGCCCTCCCTCGTGCACATTCCCTCGCCACGTGAGTG   |
| Dbp-I2 sp6 Fwd     | GTACCACTCACGTGGCGAGGAATGTGCAGGCGAGGGAGGGCGC  |
| Dbp-I2 sp6 Rev     | TCGAGCGCCCTCCCTCGCCTGCACATTCCCTCGCCACGTGAGTG |
| Dbp-I2 sp4 Fwd     | GTACCACTCACGTGGCGAATGTGCAGGGGCGAGGGAGGGCGC   |
| Dbp-I2 sp4 Rev     | TCGAGCGCCCTCCCTCGCCCTGCACATTTCGCCACGTGAGTG   |
