# Supplementary material for: Genome-Wide and Phase-Specific DNA-Binding Rhythms of BMAL1 Control Circadian Output Functions in Mouse Liver
Source: PLoS Biol. 2011 Feb 22;9(2):e1000595. doi: 10.1371/journal.pbio.1000595 (PMC3043000; doi:10.1371/journal.pbio.1000595)
Supplement: Text S1 — Supplementary methods. (0.09 MB PDF) [file pbio.1000595.s018.pdf]

# Supplementary Methods

## 1 Deconvolution method for ChIP-Seq data

We write the two counts distributions as convolutions with a fixed kernel  $\mathcal{M}$  :

$$P_{\text{tag}}^{\pm}(n) = \sum_{k > n-\ell} \mathcal{M}(\pm(k-n)) P_{\text{bind}}(k) . \quad (1)$$

We use quadratic programming with linear constraints to find the optimal solution. To derive the kernel, we assume that every position in a chromosome (or genome) of length  $L$  is equally likely to break and that the chromosome is fragmented into  $Lq$  pieces (of average size  $1/q$ ). If all breaking events are independent, then the length distribution is geometric with parameter  $q$ .

$$P_{\text{len}}^{(0)}(\lambda) = q(1-q)^{\lambda-1} .$$

To reduce the number of parameters and to avoid the complication of boundary effects, we set  $L = \infty$ . The experimental protocols typically involve selecting a band in a gel, namely using only fragments with length in the range  $[\mu, \nu]$ . In the sequel we set  $\nu = \infty$  since this is an exponentially small perturbation. However the lower bound is important and the effective length distribution is

$$P_{\text{len}}(\lambda) = \begin{cases} 0 & \text{if } \lambda < \mu , \\ q(1-q)^{\lambda-\mu} & \text{if } \lambda \geq \mu . \end{cases}$$

The fraction of transcription factors bound at position  $k$  in the genome is  $P_{\text{bind}}(k)$  and we compute the probability  $P_{\text{base}}^{-}(b)$  that a sonication fragment overlapping  $k$  breaks at  $b \geq k$ , thereby producing a count at position  $b$  on the negative strand. Such a fragment can start at any position  $a \leq k$  having length  $\lambda = b - a + 1$ . The probability of such an fragment is therefore:

$$\begin{aligned} P_{\text{base}}^{-}(b) &= C^{-1} \sum_{k \leq b} \sum_{a \leq k} P_{\text{len}}(b-a+1) P_{\text{bind}}(k) \\ &= \sum_{k \leq b} \mathcal{K}(b-k) P_{\text{bind}}(k) , \end{aligned}$$

where

$$\mathcal{K}(n) = C^{-1} \begin{cases} 1 & \text{if } 0 \leq n < \mu , \\ (1-q)^{n-\mu} & \text{if } n \geq \mu , \end{cases}$$

and  $C$  is a normalization constant to ensure  $\sum_n \mathcal{K}(n) = 1$ .

If we now take into account that tags have a length  $\ell < \mu/2$  (typically  $\ell = 38\text{bp}$  for standard Solexa GAII) and therefore cover  $\ell$  positions downstream of the break point, the distribution is affected as follows:

$$\begin{aligned}
P_{\text{tag}}^+(n) &= C^{-1} \sum_{a=n-\ell+1}^n P_{\text{base}}^+(a) \\
&= \sum_{k>n-\ell} \mathcal{M}(k-n) P_{\text{bind}}(k) ,
\end{aligned} \tag{2}$$

with

$$\mathcal{M}(n) = C^{-1} \begin{cases} (\ell+n)q & \text{if } 1-\ell \leq n < 0 , \\ \ell q & \text{if } 0 \leq n \leq \mu-\ell , \\ q(\mu-n) + 1 - (1-q)^{n+\ell-\mu} & \text{if } \mu-\ell < n < \mu , \\ (1-q)^{n-\mu}(1-(1-q)^\ell) & \text{if } n \geq \mu . \end{cases}$$

We next propose an algorithm for de-convoluting Eq. 2 for both strands simultaneously, meaning we solve the following matrix equation for  $P_{\text{bind}}$

$$\begin{pmatrix} P_{\text{tag}}^+ \\ P_{\text{tag}}^- \end{pmatrix} = \begin{pmatrix} \mathcal{M}^T \\ \mathcal{M} \end{pmatrix} \cdot P_{\text{bind}} ,$$

with the constraints

$$\sum_k P_{\text{bind}}(k) = 1 , \text{ and } P_{\text{bind}}(k) \geq 0 \ \forall k .$$

Here we represented the convolution kernel as a matrix  $\mathcal{M}_{ij} = \mathcal{M}(i-j)$ . We solve this problem by searching for the vector  $P_{\text{bind}}$  which minimizes the error

$$\mathcal{E}_0^2(P_{\text{bind}}; \mu, q, \ell) = \left\| P_{\text{tag}}^+ - \mathcal{M}^T P_{\text{bind}} \right\|^2 + \left\| P_{\text{tag}}^- - \mathcal{M} P_{\text{bind}} \right\|^2 .$$

We use quadratic programming to find such a minimizer satisfying the constraints. This is applied within each enriched region detected *a priori* by MACS [1].

## 2 Example

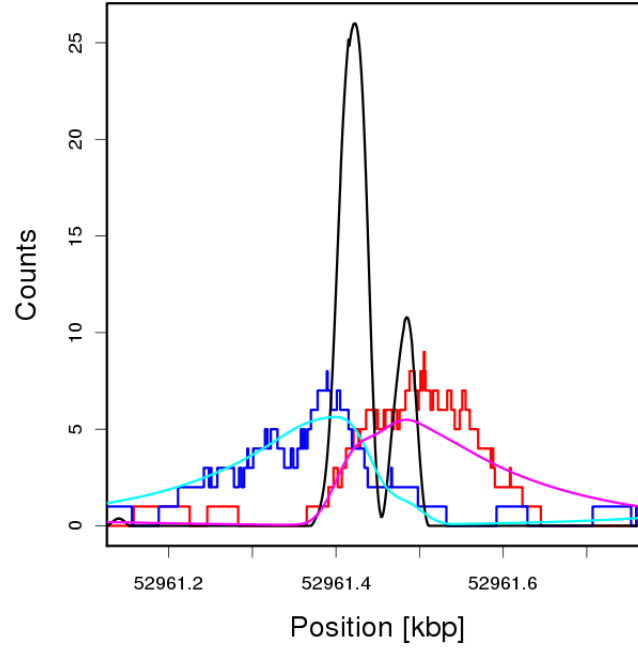

Figure 1: Deconvolution algorithm applied to the promoter site of Dbp. Black curve is  $P_{\text{bind}}$ , smooth curves are the theoretical signal for the positive and negative strands Eq. 1 and rough curves are the raw data.

## References

- [1] Zhang Y, Liu T, Meyer C, Eeckhoutte J, Johnson D, et al. (2008) Model-based analysis of chip-seq (macs). *Genome Biol* 9: R137.
